# Supplementary material
Source: Elsevier journal article supplement (https://www.sciencedirect.com/science/article/pii/S1138359318300169)
Supplement: mmc1 [file S1138359318300169:mmc1.docx]

**Tabla 1 suplementaria. Encuesta cumplimentada por los médicos de AP.**

| A) Datos generales | - Comunidad autónoma - Médicos de AP que trabajan en el centro - Distancia al centro de cardiología de referencia (aprox. km) |  |
| --- | --- | --- |
| B) Informe de alta | - ¿Recibe el informe de alta de todos sus pacientes que han sufrido un síndrome coronario agudo? | - Sí (en papel, vía e-mail, en plataforma informática compartida) - No |
| - ¿Contiene un plan de acción para la prevención secundaria? - ¿Viene indicado cuándo debe el paciente realizar el siguiente control analítico (lipídico)? | - Sí - No |
| - En su opinión, ¿cuál es el tiempo óptimo después del alta? | - De 4 a 12 semanas - De 3 a 6 meses - Más de 12 meses - No es necesario |
| - En relación al control lipídico ¿el informe de alta de sus pacientes de muy alto riesgo cardiovascular recomienda un objetivo de colesterol LDL < 70 mg/dL, tal y como viene indicado en las actuales guías europeas de prevención cardiovascular? | - Sí - No |
| - El informe de alta contiene recomendaciones de cuánto tiempo debe continuar recibiendo la medicación para la prevención secundaria? | • Sí   - No |
| - ¿Contiene un plan o recomendación para …? | - Dieta y manejo del peso - Actividad física - Deshabituación tabáquica - Manejo otros factores riesgo CV - Regreso vida laboral y discapacidades - Guía reanudación actividad sexual - Instrucciones específicas uso nitroglicerina |
| C) Integración con Cardiología | - ¿Cuál es el canal de comunicación establecido con el cardiólogo de referencia? | - Presencial CS con visitas programadas - Presencial CS de forma esporádica - Teléfono - Por e-mail - Vía web (interconsultas electrónicas) - Interconsulta en formato papel - Otros |
| - ¿Cuál es la periodicidad de comunicación/interacción con su cardiólogo de referencia? | - Muy frecuente (al menos 1 vez al mes) - Regular (menos de 1 vez al mes) - Ocasional solo cuando se solicita |
| - ¿Existen programas de rotación formativos, propuestos por los centros de referencia de Cardiología para la formación en prevención secundaria de los médicos de AP? | - Sí: a) los médicos de AP rotan en las unidades de cardiología, b) los cardiólogos de referencia forman a los médicos de AP en los centros de salud, c) ambos - No |
| - ¿Cuenta en su centro con alguna guía clínica o protocolo acerca de los pacientes coronarios consensuada con el Servicio de Cardiología de referencia? | - Sí - No - No lo sé |
| - ¿Considera que desde la gerencia en salud se favorece la integración entre AP y Cardiología para la prevención secundaria? | • Sí  • No   - No lo sé |
| - Por favor, puntúe su satisfacción en relación a la actual integración entre AP y Cardiología | - De 1 a 10 (1 = muy poco satisfecho, 10 = muy satisfecho) |
| - Percepción del impacto de la integración entre el médico de AP y el cardiólogo | - ¿Diría que existe una integración clara? - ¿Cree que la relación con los cardiólogos ha mejorado? - ¿Existe una reducción del número de visitas al cardiólogo? - ¿Considera que ha mejorado el tratamiento de prevención secundaria de sus pacientes coronarios? - ¿Se siente más seguro en la toma de decisiones de seguimiento y tratamiento de estos pacientes? - ¿Cree que los pacientes han aumentado la adherencia a los cuidados recomendados? |
| D) Percepción de la continuidad del tratamiento | - ¿Cuál es el objetivo de colesterol LDL para un paciente que ha sufrido un evento coronario agudo? | - < 70 mg/dL - < 100 mg/dL - < 130 mg/dL - No marco ningún objetivo terapéutico en estos pacientes |
| - ¿Cuál es el tiempo de espera estimado hasta que un paciente coronario es visitado por el cardiólogo de referencia tras solicitar una consulta para la prevención secundaria? | - < 3 días - De 3 a 15 días - 15 días a 1 mes - De 1 a 3 meses - > 3 meses |
| - ¿Conoce los criterios de indicación de las siguientes pruebas? | - Cardiología nuclear - TAC coronario - Ecocardiografía de estrés - Prueba de esfuerzo - Ecocardiografía - Cateterización coronaria |
| - En su opinión, ¿cuántos pacientes tras un síndrome coronario agudo alcanzan el objetivo terapéutico de colesterol LDL < 70 mg/dL como se recomienda en las guías actuales? | - < 25% - 25-50% - 50-7% - > 75% |
| - En su opinión, ¿cuántos pacientes tras un síndrome coronario agudo necesitan tomar terapia hipolipemiante combinada (estatinas + otro agente hipolipemiante) para alcanzar una concentración de colesterol LDL correcta? | - Casi ningún paciente (< 5%) - Pocos pacientes (5-25%) - Algunos pacientes (26-505) - Muchos pacientes (51-75%) - La mayoría de pacientes (76-100%) |
| - ¿Cuál es su proceder habitual en caso de una intolerancia a las estatinas confirmada? | • Cambiar a otra estatina   - Reducir la dosis o cambiar la posología (días alternos) - Usar otro agente hipolipemiante |

CV: cardiovascular; CS: centro de salud; TAC: tomografía computarizada: AP: Atención Primaria.
